# Supplementary material
Source: PubMed Central journal article supplement (PMC7394666)
Supplement: NIHMS1613569-supplement-Suppl_Figures.pdf [file NIHMS1613569-supplement-Suppl_Figures.pdf]

## Supplementary Figure 1

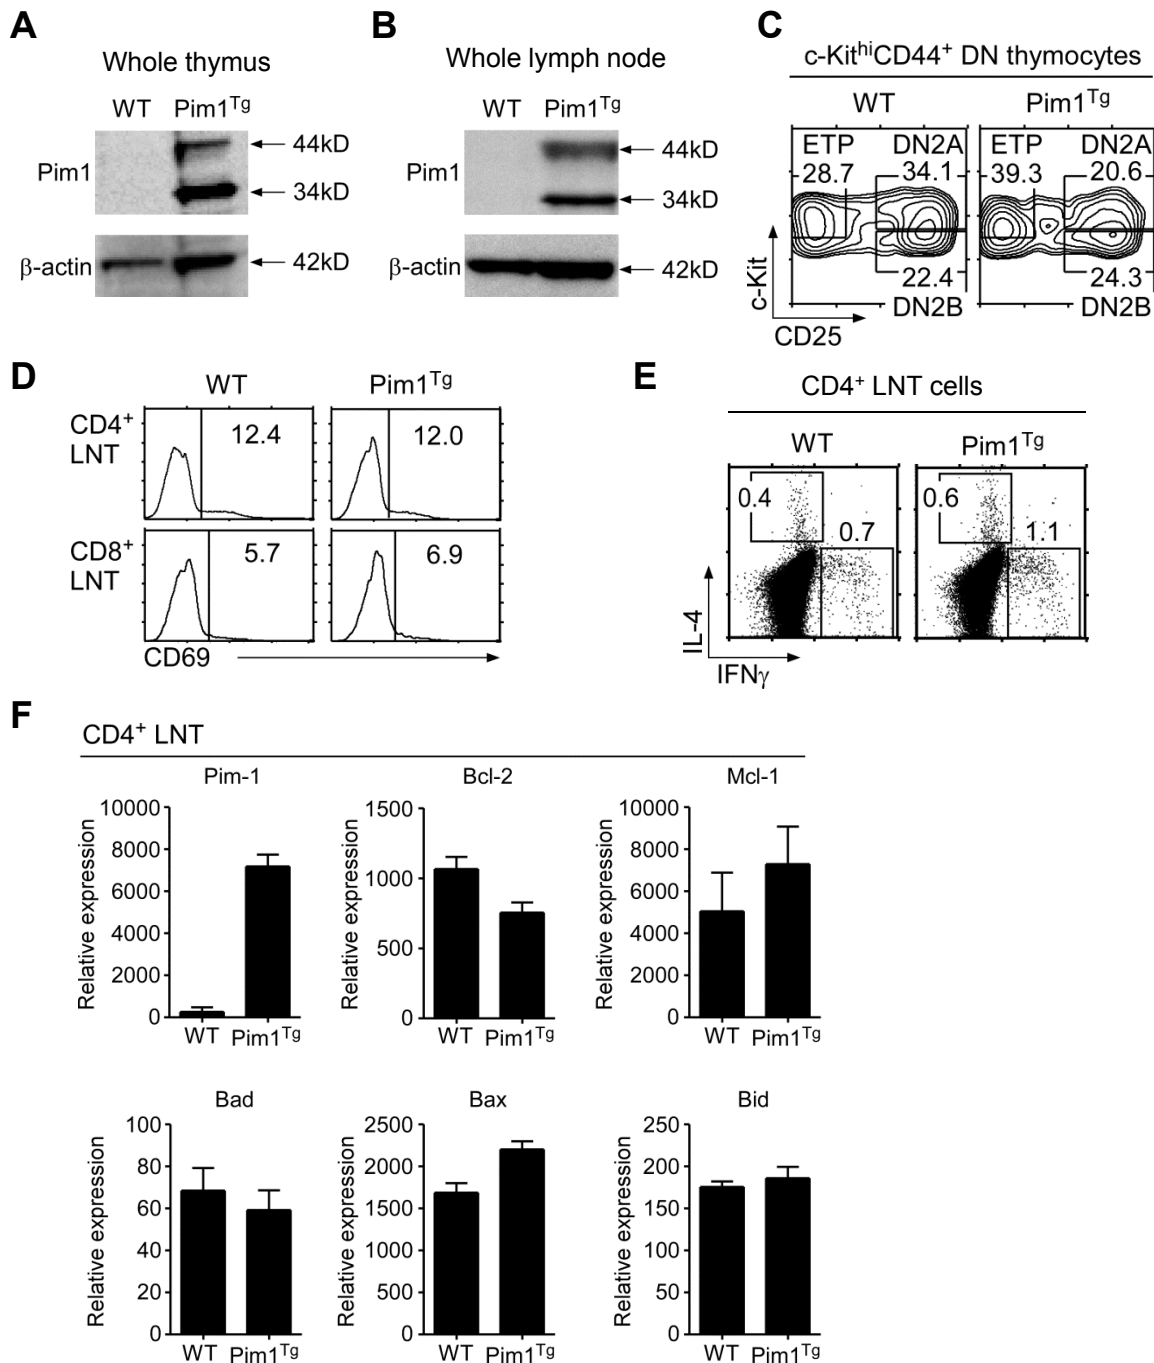

### Supplemental Fig. 1. Characterization of Pim1 transgenic mice.

Immunoblot detection of Pim1 expression in the thymus (**A**) and LN (**B**). Whole thymocyte or LN cell lysates of indicated mice were probed for Pim1 and  $\beta$ -actin. Data are representative of three independent experiments. (**C**) DN thymocyte differentiation of c-Kit<sup>hi</sup>CD44<sup>+</sup> lineage marker negative (Lin<sup>-</sup>) thymocytes. Numbers in box indicate percentages of ETP (Early Thymic Progenitor) and DN2A and DN2B cells. Data are representative of two independent experiments with each two WT and two Pim1<sup>Tg</sup> mice.

(**D**) CD69 expression on freshly isolated LNT cells. Data are representative of eight independent experiments. (**E**) Cytokine expression profiles of freshly isolated CD4<sup>+</sup> LNT cells. Intracellular IL-4 and IFN $\gamma$  expression was assessed after 3 hrs of PMA + ionomycin stimulation in the presence of brefeldin A.

(**F**) Pro- and anti-apoptotic gene expression in WT and Pim1<sup>Tg</sup> CD4<sup>+</sup> LNT cells. Total RNA from purified CD4<sup>+</sup> LNT cells were reverse transcribed into cDNA and assessed for expression of the indicated genes by quantitative RT-PCR. Data were normalized to *Hprt* expression. Data are the summary of three independent experiments.

## Supplementary Figure 2

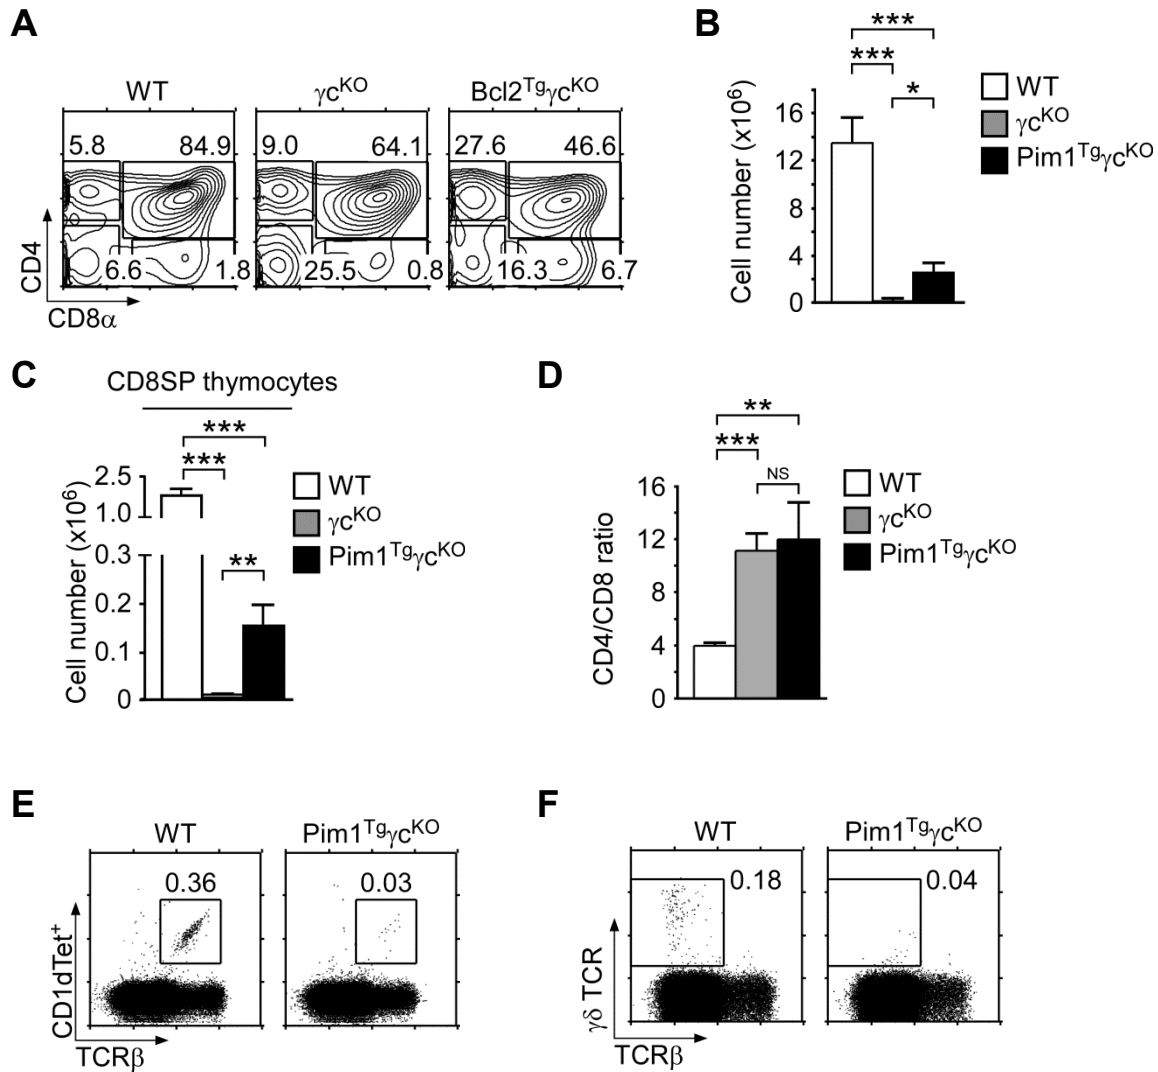

### Supplemental Fig. 2. T cell development in Pim1<sup>Tg</sup> $\gamma_c^{KO}$ mice.

(A) Thymocyte profiles of WT,  $\gamma_c^{KO}$ , and Bcl2<sup>Tg</sup> $\gamma_c^{KO}$  mice. Contour plots show CD4/CD8 profiles of whole thymocytes. Data are representative of three independent experiments.

(B) TCR $\beta^{hi}$  mature thymocyte numbers and (C) TCR $\beta^+$  CD8SP thymocyte numbers in WT,  $\gamma_c^{KO}$ , and Pim1<sup>Tg</sup> $\gamma_c^{KO}$  mice. Data are mean  $\pm$  SEM of each 12 WT, 7  $\gamma_c^{KO}$ , and 9 Pim1<sup>Tg</sup> $\gamma_c^{KO}$  mice.

(D) CD4/CD8 ratio of mature SP thymocytes. Ratios were determined from TCR $\beta^{hi}$  gated thymocytes. Data are average  $\pm$  SEM of each 12 WT, 7  $\gamma_c^{KO}$ , and 9 Pim1<sup>Tg</sup> $\gamma_c^{KO}$  mice.

(E) NKT cell development in WT and Pim1<sup>Tg</sup> $\gamma_c^{KO}$  thymocytes. Total thymocytes were assessed for TCR $\beta$  expression and CD1d-tetramer staining to identify thymic NKT cells. Data are representative of two independent experiments.

(F)  $\gamma\delta$  T cell development in WT and Pim1<sup>Tg</sup> $\gamma_c^{KO}$  thymocytes. Total thymocytes were assessed for TCR $\beta$  and  $\gamma\delta$  TCR expression to identify thymic  $\gamma\delta$  T cells. Data are representative of two independent experiments.

## Supplementary Figure 3

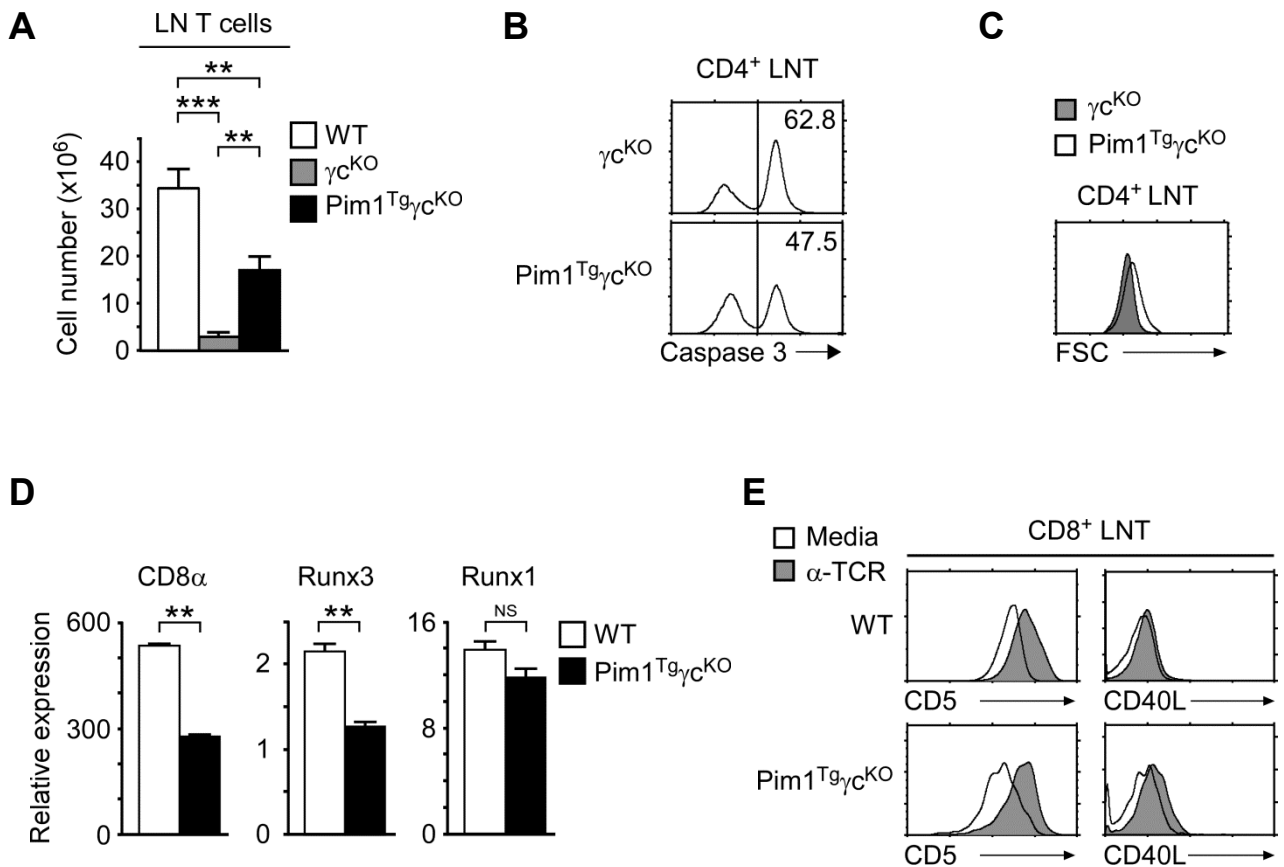

### Supplemental Fig. 3. LN T cell analysis of Pim1<sup>Tg</sup> $\gamma^C$ KO mice

(A) LN T cell numbers in WT,  $\gamma^C$  KO, and Pim1<sup>Tg</sup> $\gamma^C$  KO mice. Data are mean  $\pm$  SEM of 11 WT, 6  $\gamma^C$  KO, and 8 Pim1<sup>Tg</sup> $\gamma^C$  KO mice.

(B) Caspase-3 analysis on overnight cultured LN T cells from  $\gamma^C$  KO and Pim1<sup>Tg</sup> $\gamma^C$  KO mice. Data are representative of three independent experiments.

(C) Cell size of freshly isolated CD69 negative CD4<sup>+</sup> LNT cells. Data are representative of three independent experiments.

(D) Quantitative RT-PCR analysis of purified WT and Pim1<sup>Tg</sup> $\gamma^C$  KO CD8<sup>+</sup> LN T cells. CD8<sup>+</sup> T cells were electronically sorted from Pim1<sup>Tg</sup> $\gamma^C$  KO LN and analyzed for CD8 $\alpha$ , Runx3 and Runx1 mRNA expression. Data were normalized to *Hprt* (X1,000) and are the summary of two independent experiments.

(E) CD5 and CD40L expression on overnight TCR stimulated WT and Pim1<sup>Tg</sup> $\gamma^C$  KO CD8<sup>+</sup> LN T cells. Data are representative of two independent experiments.
